# Supplementary material
Source: PubMed Central journal article supplement (PMC3703988)
Supplement: 1305394110_pnas.201305394SI.pdf [file 1305394110_pnas.201305394SI.pdf]

# Supporting Information

Wei et al. 10.1073/pnas.1305394110

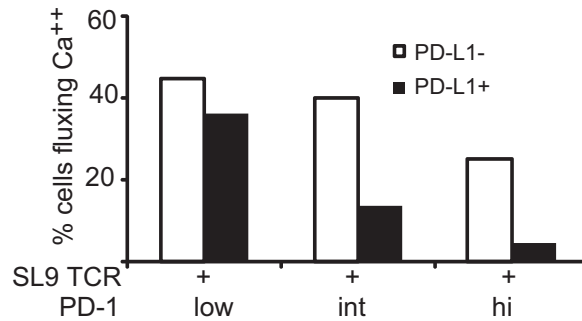

**Fig. S1.** High levels of programmed death 1 (PD-1) can inhibit Ca<sup>++</sup> flux. RNA (10  $\mu$ g) encoding both chains of the A2-SL9-specific T-cell receptor (TCR) was mixed with 0, 0.1 (low), 1  $\mu$ g (int), or 10  $\mu$ g (hi) RNA encoding PD-1 and was transfected into resting primary human CD8 T cells. T cells pulsed with the calcium-sensitive dye Fura-2 were injected into the chamber containing poly-L-lysine-anchored K.A2 DsRed SL9.PD-L1 artificial antigen-presenting cells (aAPCs), and the 510-nm emissions excited by 340 nm and 380 nm were captured immediately for 45 min at 5-s intervals. The plot shows the number of T cells that flux Ca<sup>2+</sup> at least once during the 45-min experiment as a function of PD-1 expression. An increase in the ratio of 510-nm emission excited by 340 nm to that excited by 380 nm indicated increased intracellular calcium level. T cells with a ratio more than two times higher than before stimulation were considered to have fluxed calcium. Data are representative of three individual experiments.

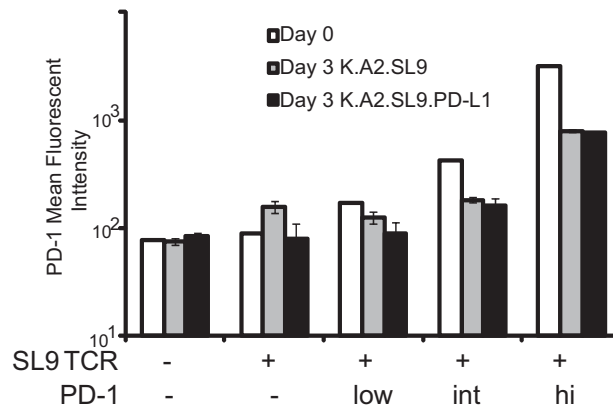

**Fig. S2.** Time course of PD-1 expression after RNA transfection. RNA (10  $\mu$ g) encoding the A2-SL9-specific TCR was mixed with 0, 0.125, 1, or 10  $\mu$ g RNA encoding PD-1 and was transfected into equally mixed resting primary human CD8 and CD4 T cells. After overnight culture, PD-1 expression was measured by flow cytometry (day 0, white bars). T cells then were stimulated with either K.A2.SL9 (gray bars) or K.A2.SL9 PD-L1 (black bars) aAPCs for 3 d, and PD-1 expression was measured again (day 3). Data are representative of three individual experiments.



SL9 TCR + PD-1<sub>LOW</sub>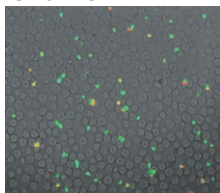

**Movie S2.** Primary data from which the still image in Fig. 2C was collected showing T cells that were transfected with a low amount (0.1  $\mu$ g) of PD-1. Movies are run at 20 $\times$  faster than real time.

[Movie S2](#)

SL9 TCR + PD-1<sub>INT</sub>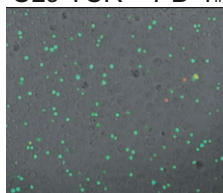

**Movie S3.** Primary data from which the still image in Fig. 2C was collected showing T cells that were transfected with an intermediate amount (1  $\mu$ g) of PD-1. Movies are run at 20 $\times$  faster than real time.

[Movie S3](#)

SL9 TCR + PD-1<sub>HIGH</sub>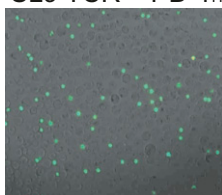

**Movie S4.** Primary data from which the still image in Fig. 2C was collected showing T cells that were transfected with a high amount (10  $\mu$ g) of PD-1. Movies are run at 20 $\times$  faster than real time.

[Movie S4](#)
